# Supplementary material
Source: Research Square preprint supplement (doi:10.21203/rs.3.rs-9620939/v1)

| Code                                                         |
|--------------------------------------------------------------|
| prevent leaks                                                |
| heavy flow                                                   |
| cycle change deploy<br>unpredictable cycle                   |
| cost barrier                                                 |
| unknown barrier                                              |
| irregular cycle                                              |
| keep products handy                                          |
| hard to plan sanitary<br>needs<br>heavy and painful<br>bleed |
| regular<br>heavy period                                      |

| theme                                  | examples                                                                                                                                                               |
|----------------------------------------|------------------------------------------------------------------------------------------------------------------------------------------------------------------------|
| priorities                             | fit/colour/<br>style<br>prevent leaks<br>convenient<br>discreet<br>enough<br>supplies for<br>deployment<br>confident                                                   |
| menstrual cycle<br>elements            | comfort<br>heavy<br>irregular<br>protection<br>require<br>double<br>trust<br>confidence<br>pain<br>visible<br>bulky                                                    |
| Comfort and fit                        | comfort<br>cost<br>unknown                                                                                                                                             |
| Hygiene and<br>cleaning                | hygiene and<br>cleaning                                                                                                                                                |
| Environmental<br>and<br>sustainability | environment<br>economic<br>al<br>products<br>need less<br>not going to<br>run out<br>less waste<br>less sani bin                                                       |
| Confidence                             | Confidence<br>run out<br>inability to<br>get to a<br>toilet when<br>needed<br>ability to<br>wash<br>depending<br>on platform<br>colour of<br>uniform and<br>of bedding |
| work factors                           | long<br>duties/watc<br>h etc<br>flying                                                                                                                                 |
| considerations<br>for use              | need to get<br>used to<br>them<br>washing                                                                                                                              |
| outcome of trial                       | continue to<br>use<br>experience<br>of trial<br>How many<br>would<br>continue?                                                                                         |

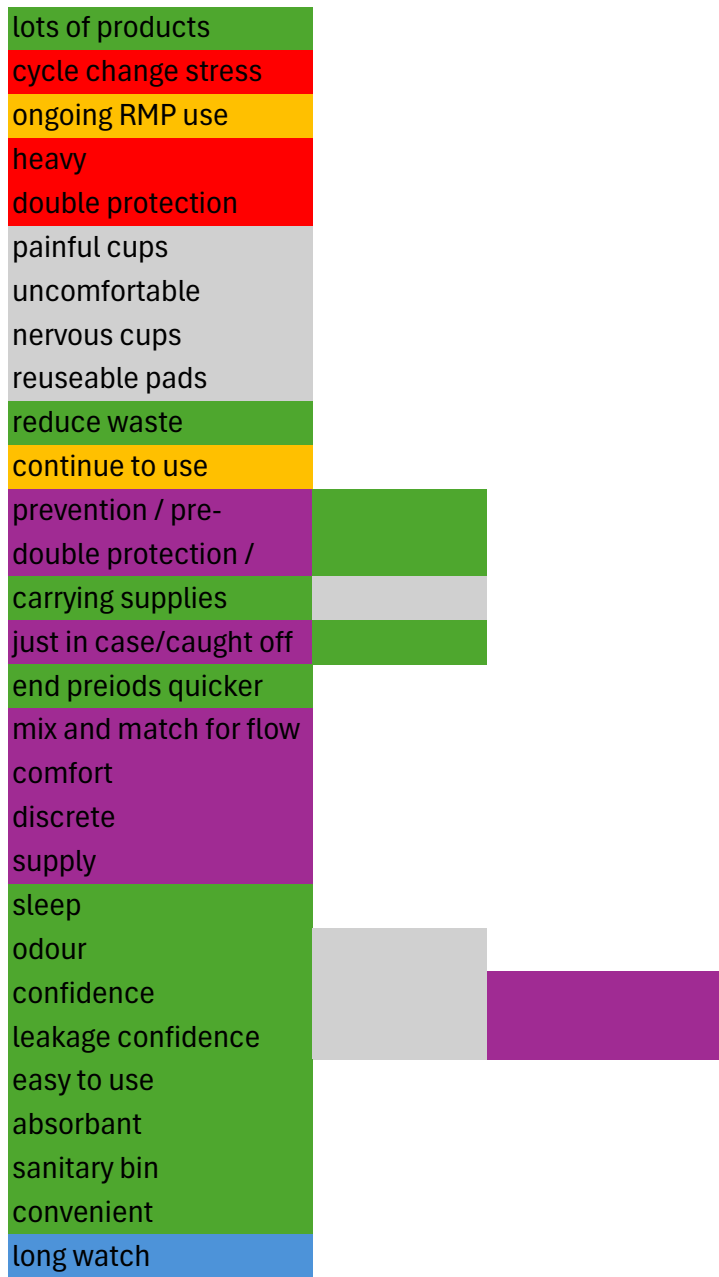

unable to get to toilet  
colour  
white bedding white  
wash ok  
less embaressment  
easy  
hygienic  
less changing  
long watches  
TSS and time wearing  
easy to clean  
reduced ability to use  
overnight  
flying  
movement of tampon  
long watch/duty  
limited ability to use  
limited ability to  
concerns over  
long duration  
opportunity to try  
waste  
supply concerns  
easy clean  
storage  
prompt cleaning  
need extra for heavy  
turn around time/lost  
number

less changes but more difficult to do

turn around time  
storage of dirty  
less products needed  
poor fit/style  
uncomfortable  
comfortable  
not bulky  
would buy more  
good fit  
not durable  
small fit  
VPL  
not preferred style  
more padding  
shrunk  
no bulking  
feels like diaper  
nappy  
visible  
bulky  
poor quality  
no leaks  
home machine  
used shower  
normal wash  
dry well  
self service  
pre rinse  
local purchase

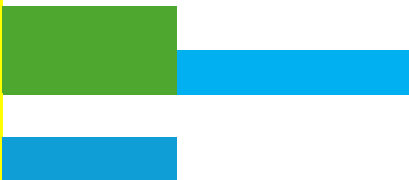

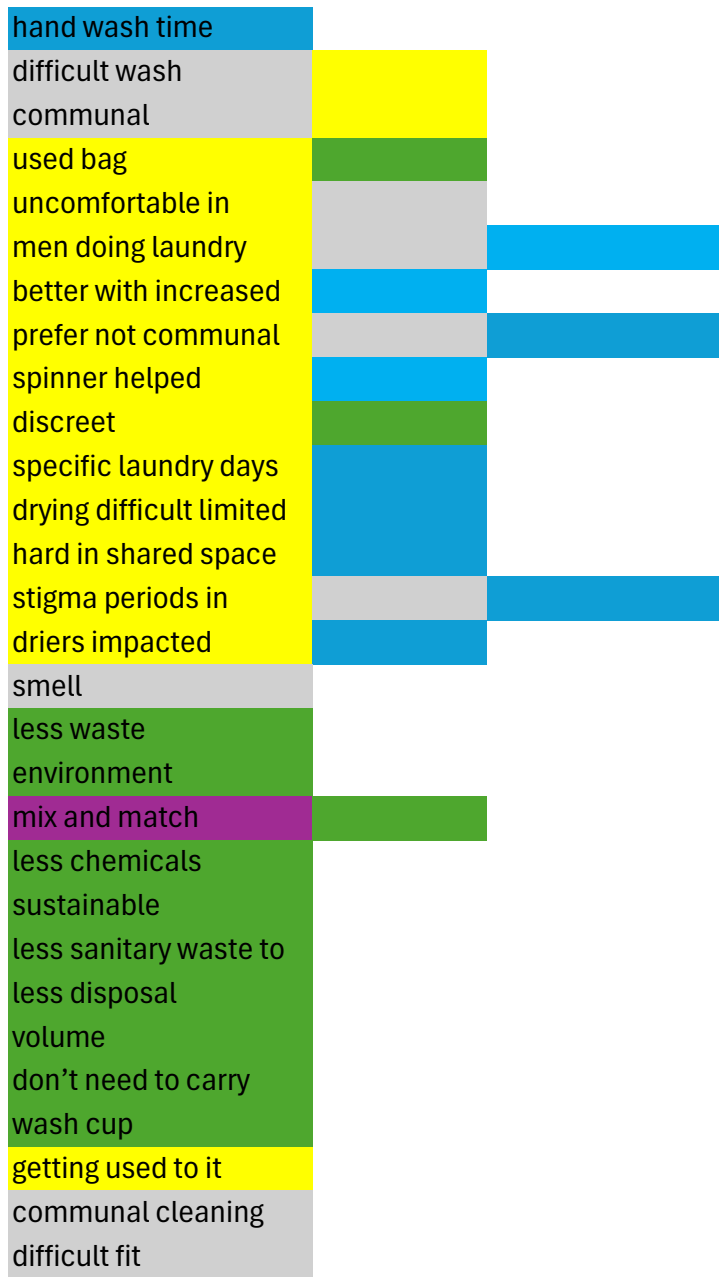

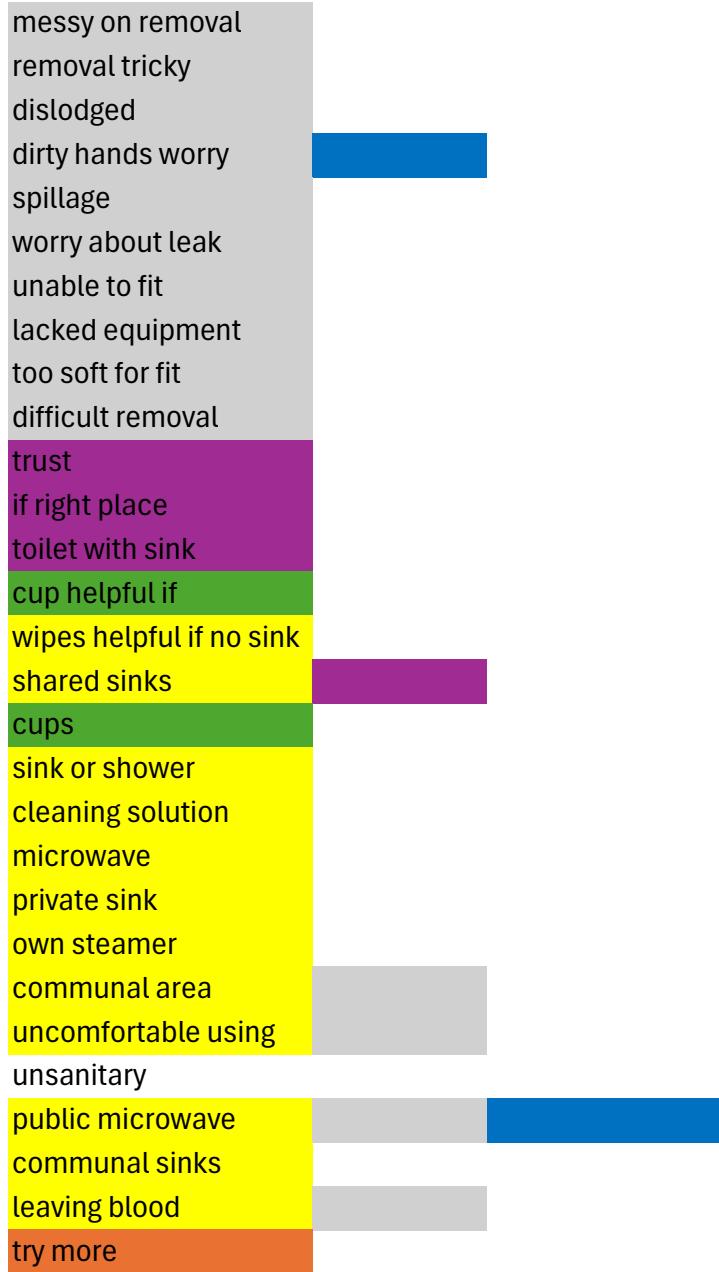

purchase more  
continue  
prefer  
awareness of options  
changed mind with  
should be widely used  
increased confidence  
recommend to others  
culture change  
not sure at  
thank you  
good information  
well explained  
great to try without  
future benefit  
wider use  
gender neutral  
good trial  
additional products  
range of products  
positive  
unchanged  
unsure when deployed

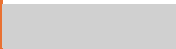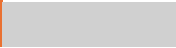

Supplement: Supplementary file 1 [file 23f2bf7f0bf418b0bc41ef59.pdf]
